# Supplementary material
Source: publisher site journal article supplement (https://www.dovepress.com/article/323979)
Supplement: Supplementary file 1 [file get_supplementary_file.php]

| **Table S1.** **Patient characteristics categorized by age group** | | | | |
| --- | --- | --- | --- | --- |
|  | **Elderly** | | **Young** | **P value** | |
|  | **Age≥80**  (N=334) | **70≤Age＜80**  (N=341) | **Age＜70**  (N=286) |
| **Characteristics** |  |  |  |  | |
| Age, y | 83.8±3.1 | 75.5±2.7 | 57.9±10.0 | **＜0.001** | |
| Male, % | 49.7 | 51.9 | 66.8 | **＜0.001** | |
| Weight, kg | 64.5±12.1 | 68.4±12.9 | 73.1±15.3 | **＜0.001** | |
| BMI, kg/m2 | 24.2±4.1 | 25.4±4.3 | 25.9±4.7 | **＜0.001** | |
| Systolic BP, mmHg | 137.3±20.6 | 135.8±22.8 | 133.2±24.4 | 0.08 | |
| Diastolic BP, mmHg | 74.3±11.3 | 73.5±11.3 | 81.7±15.6 | **＜0.001** | |
| HF history＞18 months, % | 27.8 | 28.5 | 26.9 | 0.91 | |
| Ischemic etiology, % | 69.2 | 67.5 | 62.9 | 0.24 | |
| **Comorbidities, %** |  |  |  |  | |
| AMI | 11.1 | 10.6 | 9.1 | 0.70 | |
| AF | 53.9 | 48.4 | 33.2 | **＜0.001** | |
| DM | 38.6 | 40.5 | 38.8 | 0.68 | |
| COPD | 9.0 | 9.4 | 2.5 | **＜0.001** | |
| Current smokers | 6.3 | 10.0 | 29.2 | **＜0.001** | |
| Device therapy, % |  |  |  |  | |
| ICD/CRT | 3.6 | 7.6 | 9.1 | **0.02** | |
| **NYHA functional class, %** |  |  |  | **＜0.001** | |
| I | 0.6 | 3.2 | 6.3 |  | |
| II | 28.7 | 36.1 | 33.6 |  | |
| III | 53.0 | 48.7 | 43.0 |  | |
| VI | 17.7 | 12.0 | 17.1 |  | |
| **Lab results** |  |  |  |  | |
| Hemoglobin, g/L | 116.4±20.8 | 122.1±20.3 | 134.7±21.6 | **＜0.001** | |
| Lymphocyte, % | 22.5±9.1 | 24.3±9.5 | 25.1±9.6 | **0.002** | |
| Sodium, mmol/L | 139.2±4.5 | 139.7±4.0 | 139.7±3.6 | 0.19 | |
| Total cholesterol, mmol/L | 3.6±1.0 | 3.8±1.0 | 4.1±1.0 | **＜0.001** | |
| Uric acid, mmol/L | 398.9±135.2 | 397.9±127.6 | 422.2±140.3 | **0.04** | |
| Serum creatinine, umol/L | 105.5±57.7 | 104.2±64.0 | 104.9±100.2 | 0.97 | |
| eGFR, mL/min/1.73m2 | 36.6±17.1 | 40.6±18.8 | 51.8±23.0 | **＜0.001** | |
| **LVEF category, %** |  |  |  | **＜0.001** | |
| Preserved (≥50%) | 64.1 | 59.0 | 27.3 |  | |
| Borderline (41%-49%) | 13.2 | 12.0 | 16.8 |  | |
| Reduced (≤40%) | 22.8 | 29.0 | 55.9 |  | |
| **BBB (LBBB or QRS duration>120ms), %** | 13.5 | 15.0 | 12.9 | 0.73 | |
| **Medication, %** |  |  |  |  | |
| ACEI/ARB/ARNI | 61.7 | 66.6 | 76.2 | **＜0.001** | |
| Beta-blockers | 77.0 | 76.8 | 86.7 | **0.002** | |
| Spironolactone | 58.4 | 66.0 | 74.8 | **＜0.001** | |
| Statins | 77.8 | 78.0 | 70.3 | **0.04** | |
| Diuretic | 92.5 | 91.8 | 83.6 | **＜0.001** | |
| Allopurinol | 11.1 | 9.6 | 4.9 | **0.02** | |
| **One-year all-cause mortality** | 8.0 | 7.9 | 14.1 | **0.01** | |

Values are mean ± standard deviation, or %;

Statistical significance (P<0.05) is indicated in bold text;

ACE, angiotensin-converting enzyme; AF, atrial fibrillation; AMI, acute myocardial infarction; ARB, angiotensin II receptor blocker; BMI, body mass index; BP, blood pressure; COPD, chronic obstructive pulmonary disease; CRT, cardiac resynchronization therapy; DM, diabetes mellitus; eGFR, estimated glomerular filtration rate; HF, heart failure; ICD, implantable cardioverter-defibrillator; LBBB, left bundle branch block; LVEF, left ventricular ejection fraction; MAGGIC, Meta-analysis Global Group in Chronic Heart Failure; NYHA, New York Heart Association functional class; SHFM, Seattle Heart Failure Model; TC, total cholesterol.
